# Supplementary material for: IL-20 controls resolution of experimental colitis by regulating epithelial IFN/STAT2 signalling
Source: PubMed Central journal article supplement — Gut. 2023 Oct 26;73(2):282–97. doi: 10.1136/gutjnl-2023-329628 (PMC10850655; doi:10.1136/gutjnl-2023-329628), 2023-10-26
Supplement: gutjnl-2023-329628supp011.pdf [file gutjnl-2023-329628supp011.pdf]

**Suppl. Table 1. Clinical characteristics of patient cohorts used in the study**

|                           | <b>Non-IBD<br/>Controls</b> | <b>Crohn's<br/>disease</b> | <b>Ulcerative<br/>colitis</b> |
|---------------------------|-----------------------------|----------------------------|-------------------------------|
| <b>Number</b>             | 69                          | 148                        | 97                            |
| <b>Mean age</b>           | 52                          | 39                         | 34                            |
| <b>Sex ratio (F/M)</b>    | 0.8                         | 1.1                        | 0.9                           |
| <b>Sample origin</b>      |                             |                            |                               |
| Colon (%)                 | 52                          | 26                         | 89                            |
| Ileum (%)                 | 48                          | 74                         | 11                            |
| <b>Inflammation score</b> |                             |                            |                               |
| No (%)                    | 100                         | 28                         | 22                            |
| Low (%)                   | 0                           | 30                         | 25                            |
| Medium (%)                | 0                           | 20                         | 28                            |
| High (%)                  | 0                           | 22                         | 25                            |
| <b>Therapy</b>            |                             |                            |                               |
| Biologic therapy (%)      | 0                           | 65                         | 35                            |
| Non-biologic therapy (%)  | 0                           | 16                         | 51                            |
| No therapy (%)            | 100                         | 19                         | 14                            |

IBD, inflammatory bowel disease
