# Supplementary figures and images for: IL-20 controls resolution of experimental colitis by regulating epithelial IFN/STAT2 signalling
Source: PubMed Central journal article supplement — Gut. 2023 Oct 26;73(2):282–97. doi: 10.1136/gutjnl-2023-329628 (PMC10850655; doi:10.1136/gutjnl-2023-329628), 2023-10-26

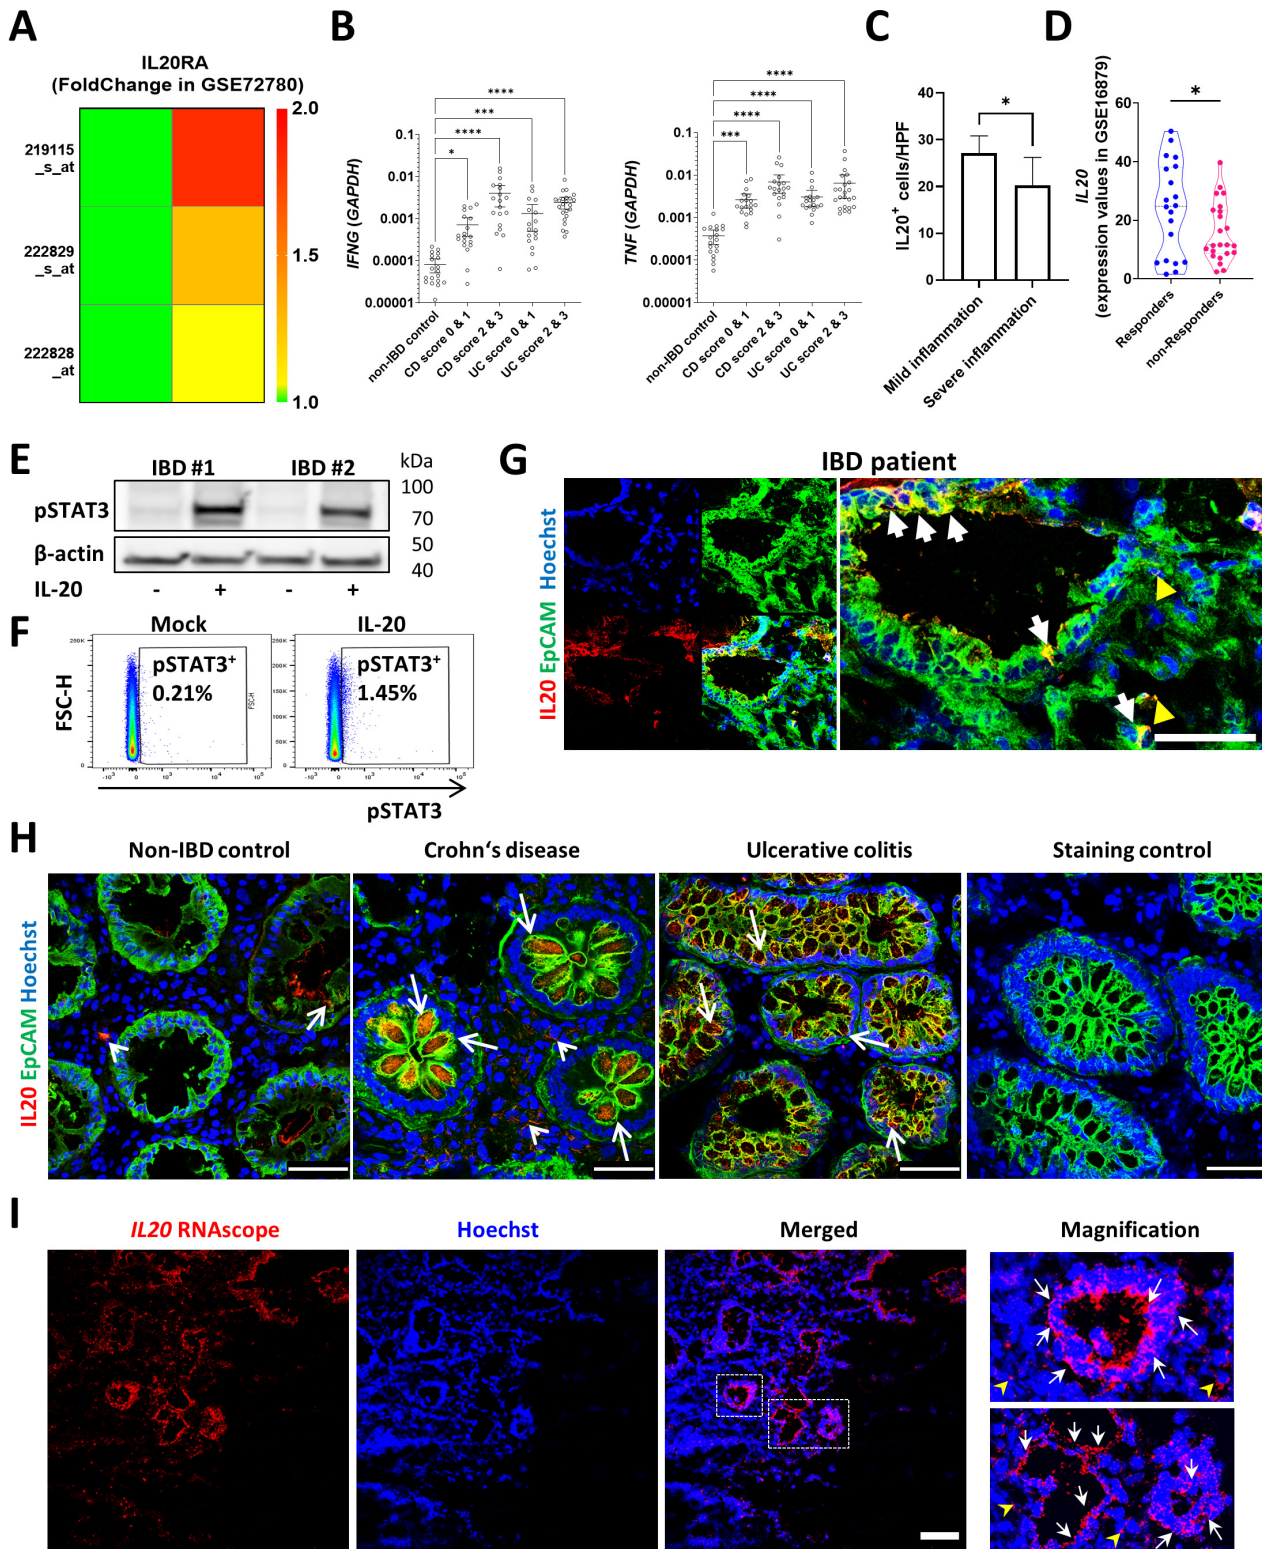

Supplement: gutjnl-2023-329628supp002.pdf [file gutjnl-2023-329628supp002.pdf]

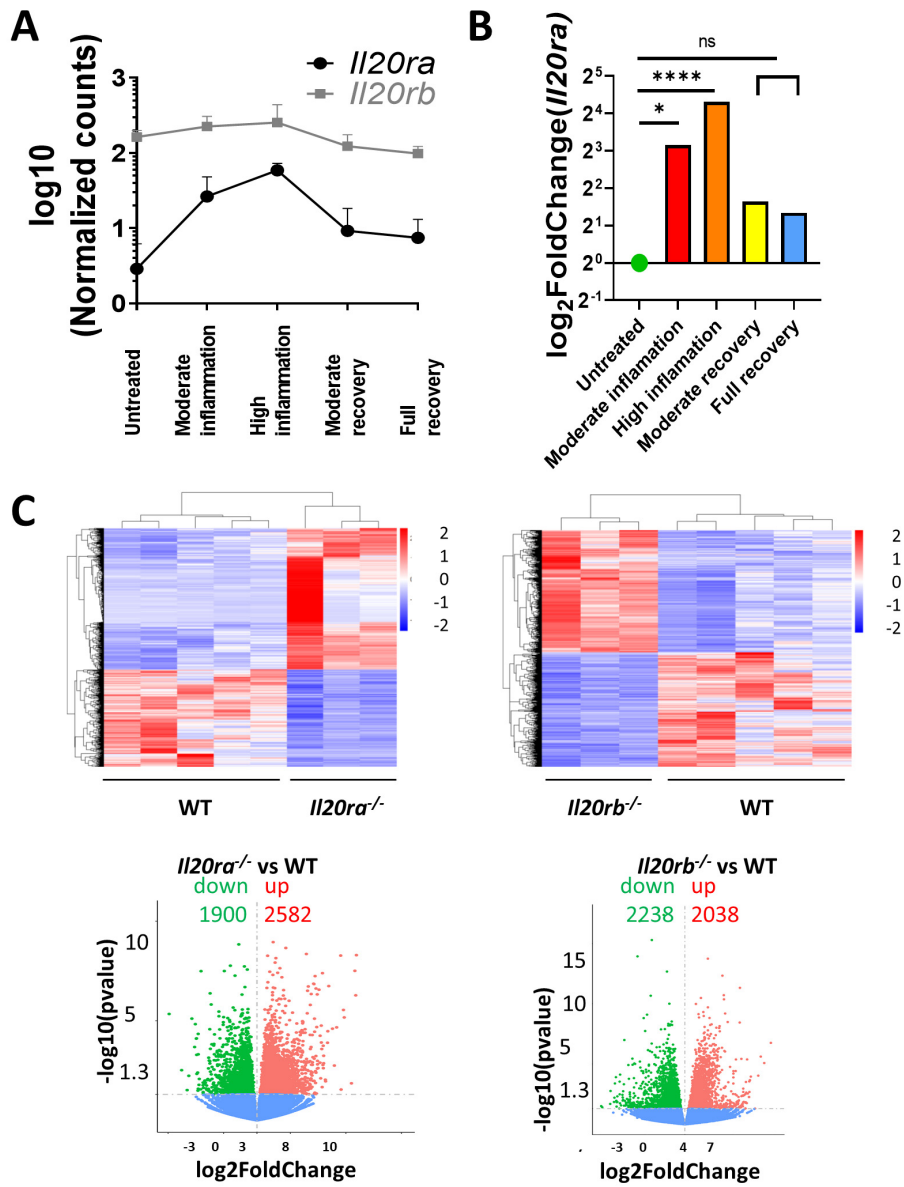

Supplement: gutjnl-2023-329628supp003.pdf [file gutjnl-2023-329628supp003.pdf]

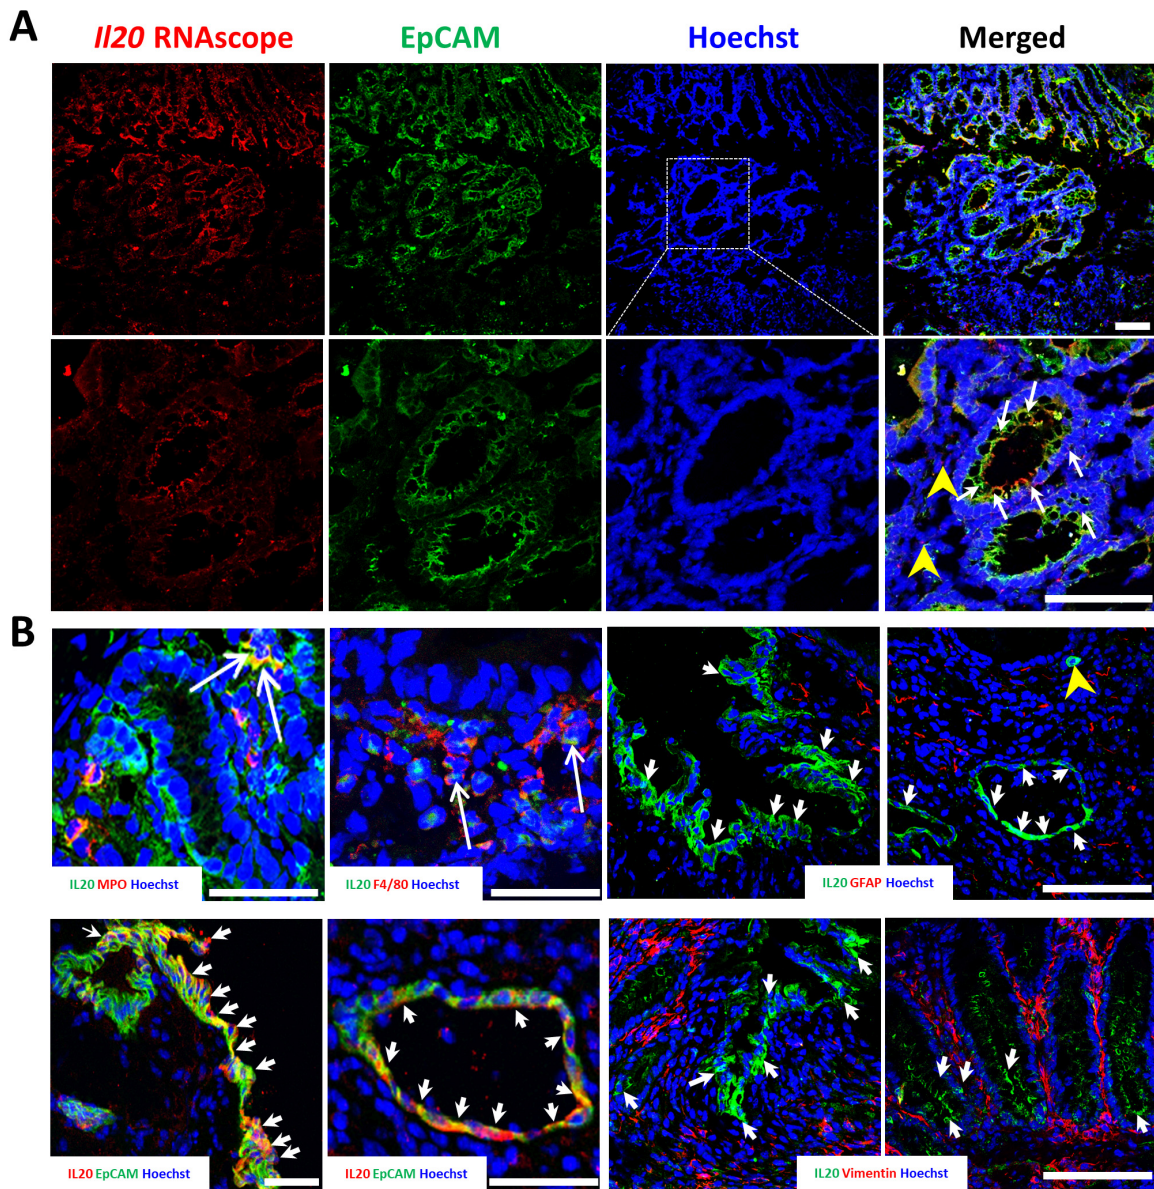

Supplement: gutjnl-2023-329628supp004.pdf [file gutjnl-2023-329628supp004.pdf]

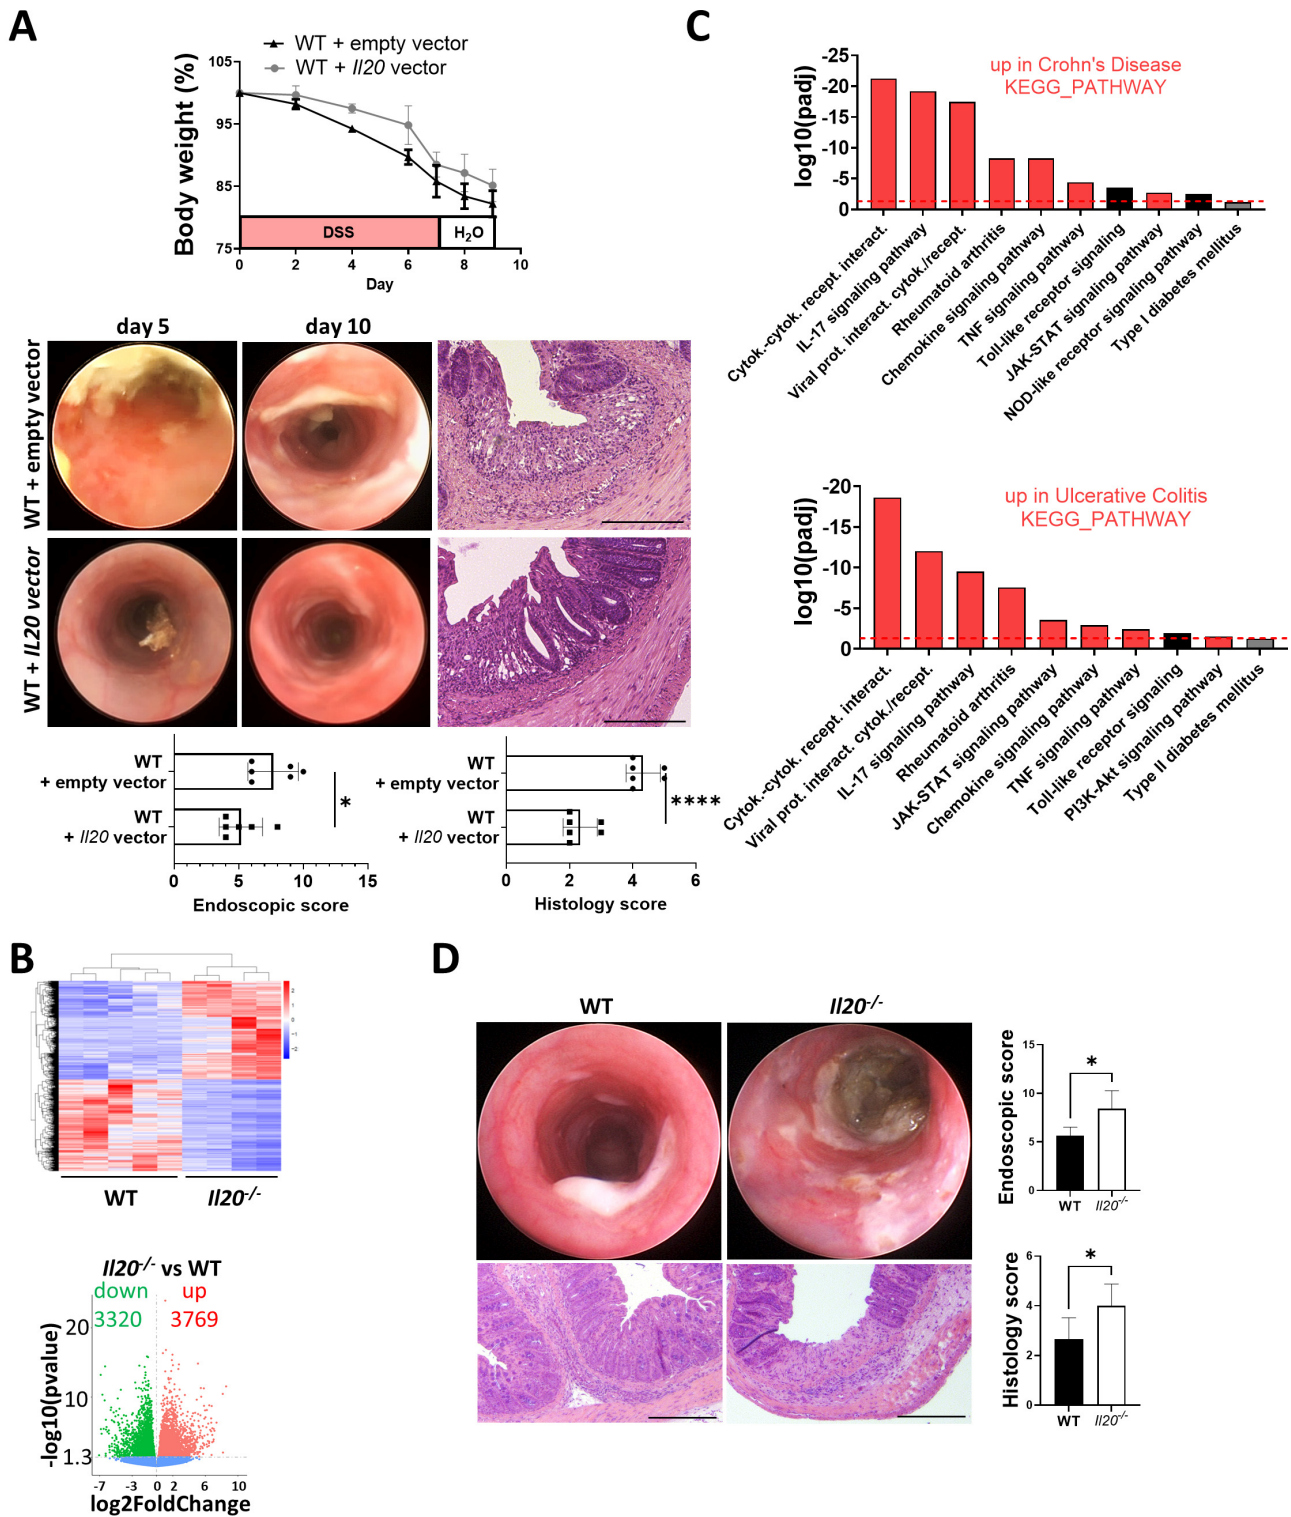

Supplement: gutjnl-2023-329628supp005.pdf [file gutjnl-2023-329628supp005.pdf]

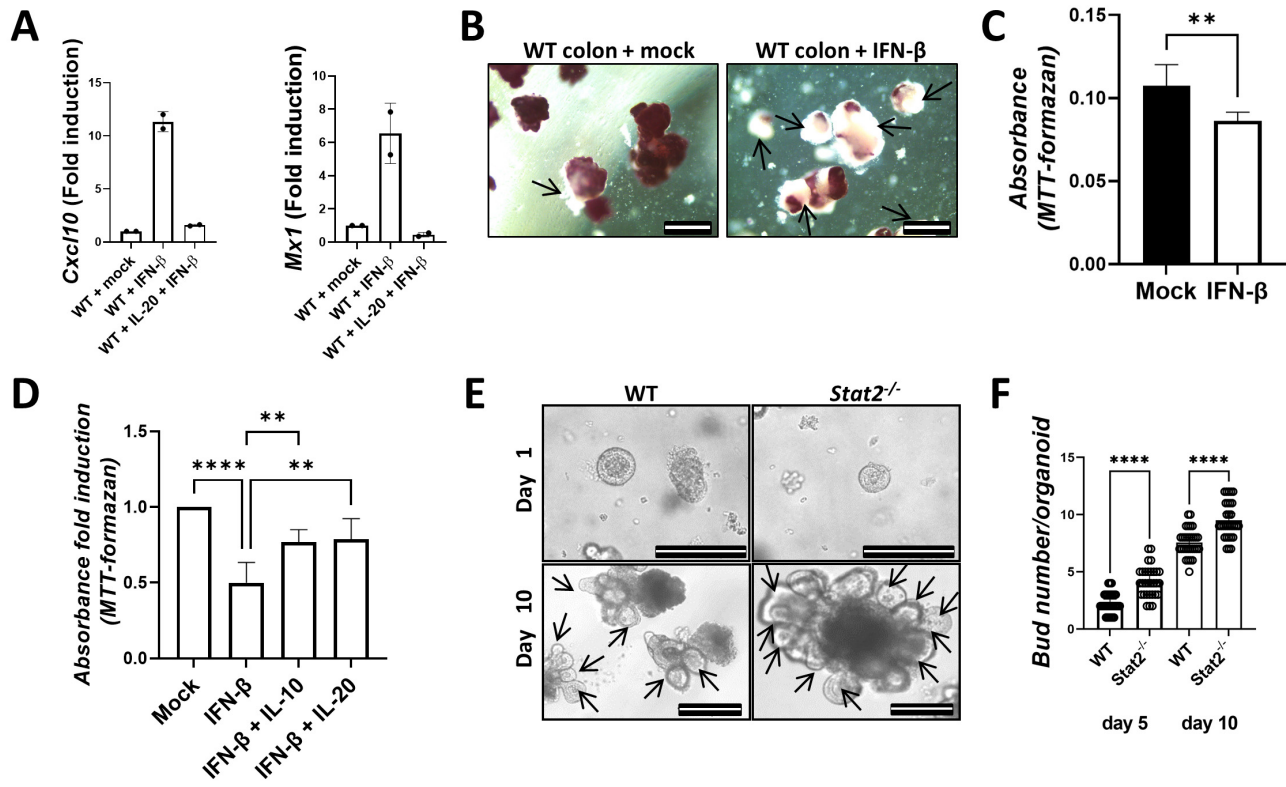

Supplement: gutjnl-2023-329628supp006.pdf [file gutjnl-2023-329628supp006.pdf]

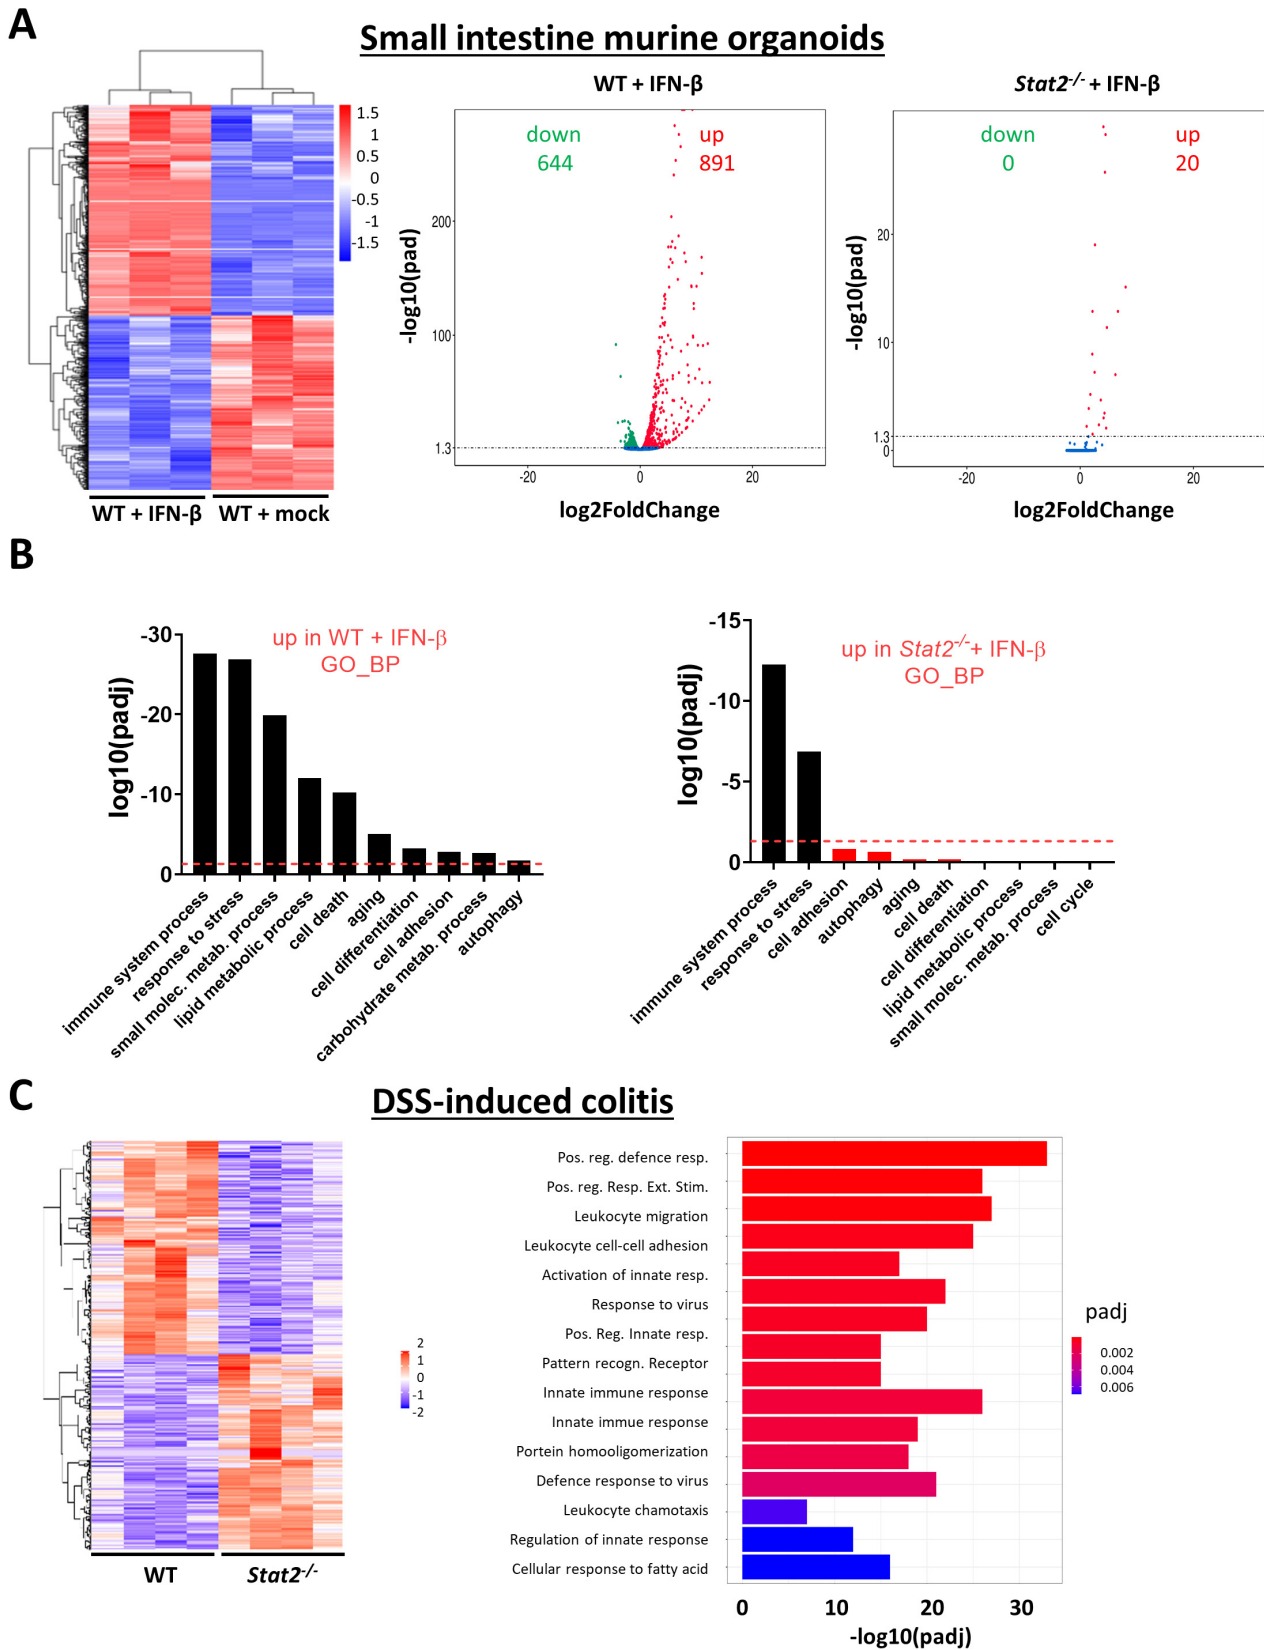

Supplement: gutjnl-2023-329628supp007.pdf [file gutjnl-2023-329628supp007.pdf]

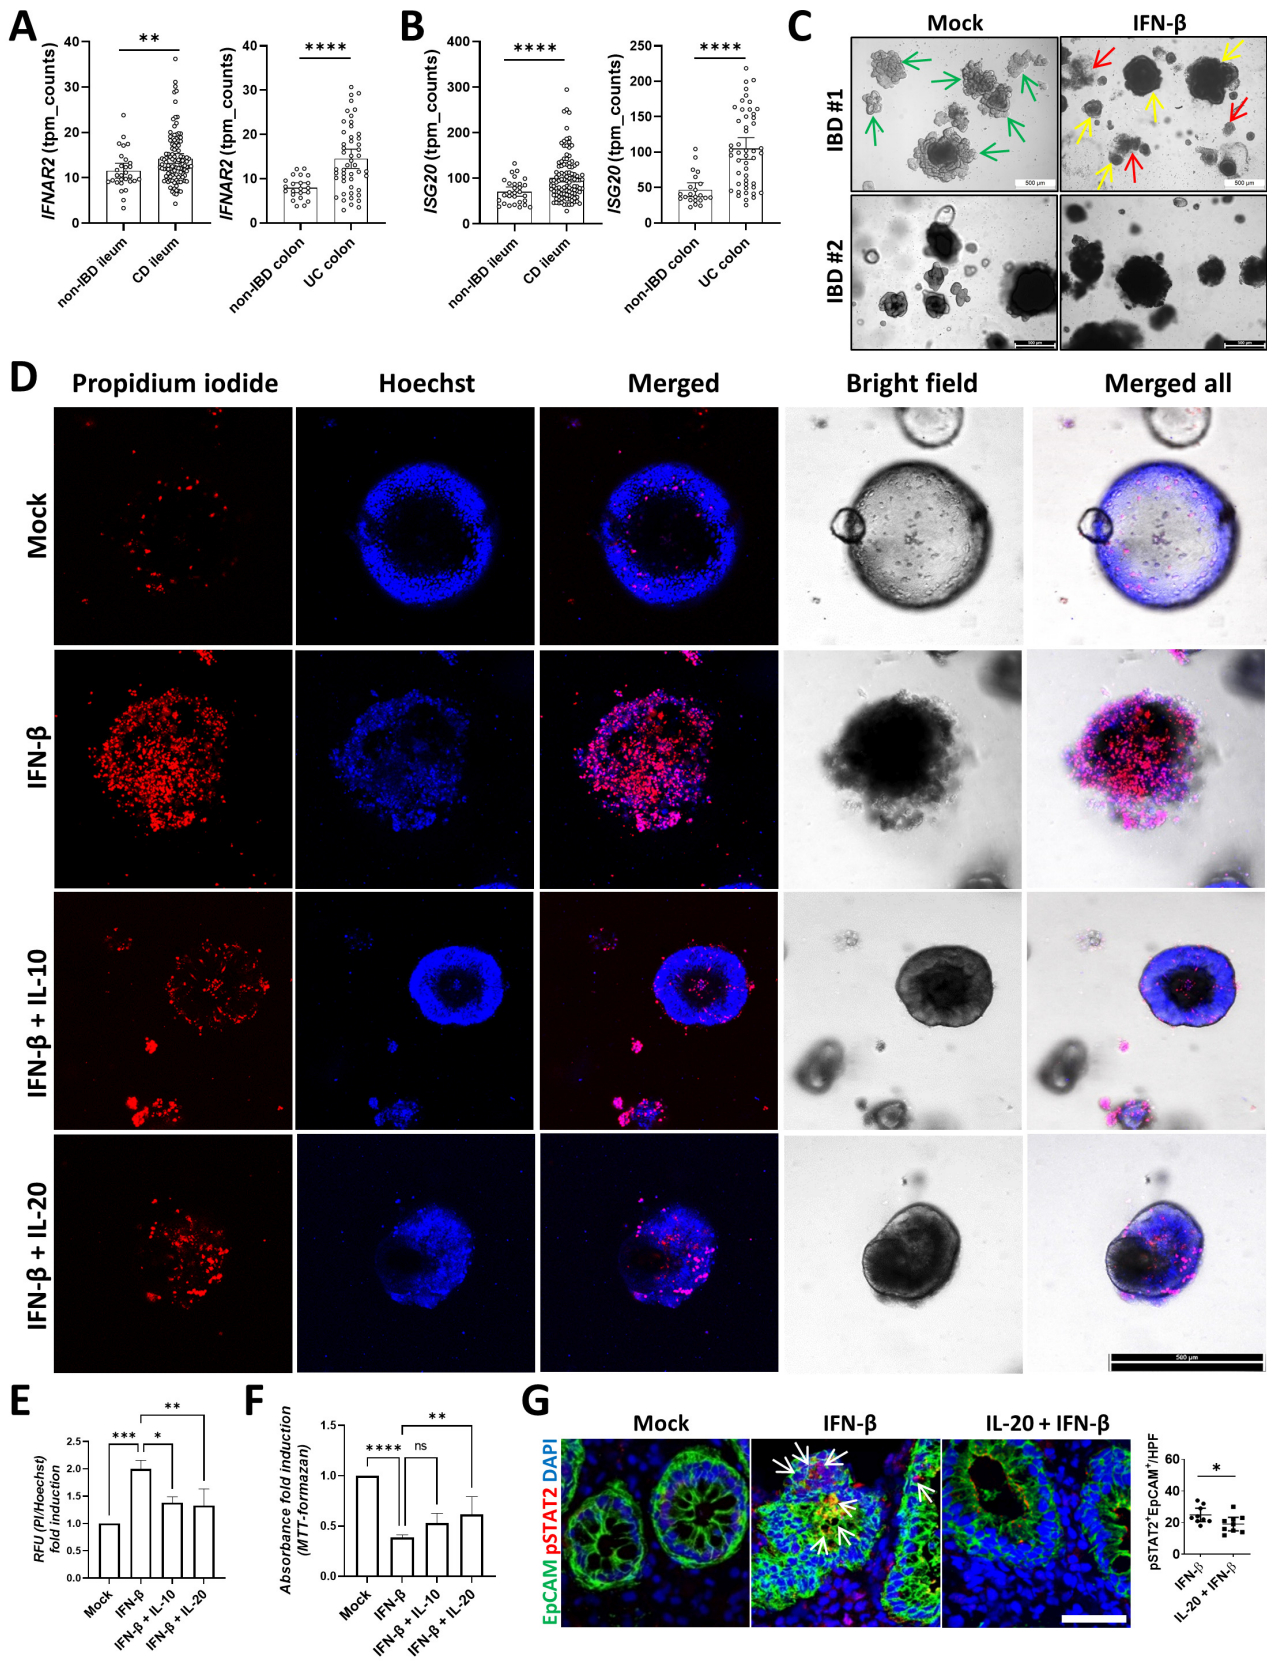

Supplement: gutjnl-2023-329628supp008.pdf [file gutjnl-2023-329628supp008.pdf]
